# Supplementary material for: Carving the shell thickness of tungsten trioxide hollow multi-shelled structures for enhanced photocatalytic performance
Source: Royal Society of Chemistry journal article supplement (doi:10.1039/d1qm01124c), 2021-01-01
Supplement: d1qm01124c1.pdf [file d1qm01124c1.pdf]

## **Carving Shell Thickness of Tungsten Trioxide Hollow Multi-Shelled Structures for Enhanced Photocatalytic Performance**

*Xing Zhang<sup>1</sup>, Yilei He<sup>1</sup>, Yanze Wei<sup>2\*</sup> and Ranbo Yu<sup>1,3\*</sup>.*

1 Department of Physical Chemistry, School of Metallurgical and Ecological Engineering, University of Science and Technology Beijing, 30, Xueyuan Road, Haidian District, Beijing 100083, China.

2 State Key Laboratory of Biochemical Engineering, Institute of Process Engineering, Chinese Academy of Sciences, 1 North 2nd Street, Zhongguancun, Haidian District, Beijing 100190, China.

3 Key Laboratory of Advanced Material Processing & Mold, Ministry of Education, Zhengzhou University, Zhengzhou 450002, P. R. China.

## **Supporting information:**

### **Methods:**

*Reagents:* The chemical reagents including sucrose, anhydrous ethanol (EtOH), and acetone were purchased from the Sinopharm Chemical Reagent Co., Ltd. Tungsten chloride ( $\text{WCl}_6$ ), silver nitrate ( $\text{AgNO}_3$ ) and dimethylformamide (DMF) were purchased from Aladdin industrial Co., Ltd. All above chemicals were analytically pure and used as received without further purification. Deionized water was used in all experiments.

*Fabrication of carbonaceous microspheres (CMSs) templates.* CMS templates were fabricated through the hydrothermal polymerization reaction of sucrose according to previous literature. Briefly, 130 g of sucrose was slowly added into 250 ml of deionized water to form a transparent solution. Then the mixture was transferred into a 500 ml Teflon-lined autoclave, which was sealed and heated at 200 °C for 123 min. For fabrication of CMS with larger size, the hydrothermal reaction time was elongated to 130 min. After the autoclave cooled to room temperature, the resulting brown product was collected by vacuum filtration, washed 6 times with deionized water and anhydrous ethanol and dried at 65 °C for 12 h for further use.

*Fabrication of thick-shelled  $\text{WO}_3$  hollow multi-shelled structures (HoMSs).* Sequential template approach (STA) was applied to fabricate thick-shelled  $\text{WO}_3$  HoMSs by applying EtOH as the precursor solution. Typically, 0.6 g freshly prepared CMSs were added into 30 ml anhydrous ethanol containing 0.6 g of  $\text{WCl}_6$  and the mixture was subjected to ultrasonic shaking for 5 min to ensure the uniform dispersion of CMS templates. Subsequently, the suspensions were placed in water bath with varying temperature (25-50 °C) and time (6 h-12 h), followed by filtering and washing with anhydrous ethanol for several times, and drying in an oven at 65 °C overnight. Finally, the resulted composites were heated to 450 °C in Muffle furnace at the rate of 2 °C  $\text{min}^{-1}$  and kept for 1 h to remove the templates. To get the  $\text{WO}_3$  hollow structures with high crystallinity, the samples was further heated to 600 °C and held for 1 h. For the synthesis of triple-shelled thick  $\text{WO}_3$  HoMSs, CMSs templates with larger size were employed, following similar treating process.

*Fabrication of thin-shelled  $\text{WO}_3$  HoMSs.* Although similar STA method was applied, the composition of precursor solution was critical in the preparation of thin-shelled  $\text{WO}_3$  HoMSs. The shell number could be regulated by tuning the adsorption conditions, including the adsorption temperature and adsorption durations. Take the synthesis of thin triple-shelled  $\text{WO}_3$  HoMSs as an

example, 0.24 g of  $\text{WCl}_6$  was firstly dissolved in 30 mL mixed solution of EtOH and acetone (1:2) via ultrasonication. Then 0.6 g newly prepared CMSs were dispersed in the mixture, followed by adding for 3 h in 25 °C water bath under stirring. Finally, the CMSs was separated by vacuum filtration, washed with anhydrous ethanol and dried at 65 °C overnight. The calcination procedure was same as thick-shelled ones. The experimental details in the absorption process of different types of  $\text{WO}_3$  hollow structures are shown in Supplementary Table 2.

*Characterizations.* Powder X-ray diffraction patterns were recorded by X-ray diffractometer (XRD, Panalytical X' Pert PRO MPD) with Cu-K $\alpha$  radiation. SEM images of selected samples were taken on Zeiss Supra-55 field emission scanning electron microscopy operated at 15 kV. TEM images were taken on JEOL JEM-2100F field-emission high-resolution electron microscopy operated at 200 kV. X-ray photoelectron spectroscopy (XPS) were conducted on an ESCALab220i-XL electron spectrometer equipped with 300 W Al K $\alpha$  radiation. The binding energies of the XPS date were standardized with respect to C 1s peak at 284.8 eV. Raman spectra were measured by using a Raman Spectrometer (Renishaw, in Via reflex) with excitation laser wavelength of 532 nm. Dynamic light scattering (DLS) measurement was conducted on Malvern Zetasizer Nano ZS90. All contact angle images were taken on contact angle analyzer (DM-701 Kyowa Interface Science Co., Ltd.) The thermogravimetric and differential thermal analysis (TGA-DTA) date of carbonaceous microspheres templates were collected by a DTA-60 (Shimadzu). Diffuse reflectance ultraviolet visible (UV-vis) of photocatalysts were obtained by a Varian Cary 5000UV-vis spectrometer with the reflectance standard of  $\text{BaSO}_4$ . Nitrogen adsorption-desorption isotherms were carried out on a Quantochrome Autosorb 1-MP sorption analysis. The Photoluminescence (PL) emission spectra were detected on a LP920 laser flash photolysis spectrometer at ambient temperature with the excitation wavelength of 325 nm. Photocurrent response performance of samples were recorded via a CHI760E electrochemical workstation equipped with a standard three-electron cell. The saturated Ag/AgCl and Pt wire were used as reference electrode and counter electrode. The catalysts were spread on the FTO glass through a printing method and used as working electrode in 0.2 M  $\text{Na}_2\text{S}$  and 0.04 M  $\text{Na}_2\text{SO}_3$  mixed aqueous solution. Electrochemical impedance spectra (EIS) were recorded over a range from 0.1 to  $2 \times 10^5$  Hz at a 0.02 V bias potential vs Ag/AgCl electrode. 0.5 M potassium phosphate buffer solution (pH = 7) was utilized as electrolyte.

*Photocatalytic oxygen evolution performances.* Photocatalytic oxygen evolution activities of the

obtained WO<sub>3</sub> HoMSs were carried out by using Labsolar 6A photocatalytic system (Beijing Perfectlight Technology Co. Ltd, China). AgNO<sub>3</sub> was used as sacrificial agent in photocatalytic water oxidation reaction. The system was composed of a closed gas circulation and a gas chromatography (GC-7900, Techcomp, China, TCD, argon as carrier gas). A 300 W Xe lamp (with a UV-cut filter  $\lambda > 400$  nm) was used as the light source. Typically, 30 mg of the photocatalyst was dispersed in 100 ml 0.01 M AgNO<sub>3</sub> aqueous solution in a Pyrex glass reactor. During the measure process, the reactor cell was maintained at a constant temperature of 8 °C under vigorous stirring. The amounts of gaseous products were online analyzed by gas chromatography at an interval of 30 min with reaction time for 4h. Besides, the apparent quantum efficiency (AQE) was determined using a 300 W Xe lamp equipped with additional monochromatic optical filter. 150 mg of the photocatalyst were used for each test. The AQE was calculated according to the formula:

$$\text{AQE} = (4 \times \text{the number of evolved O}_2 \text{ molecules} / \text{number of incident photons}) \times 100\%$$

*Theoretical calculation and FDTD simulations.* All DFT calculations in this work including crystal structures and optic properties of WO<sub>3</sub> HoMSs were conducted using the Vienna Ab Simulation Package via projector-augmented wave pseudopotentials. The plane-wave cutoff energy was 450 eV, a k-mesh of 4×4×4 gamma points was adopted to sample the Brillouin zone, and the Gaussian smearing was applied with a width of 0.05 eV. The hybrid density functional developed by Heyd, Scuseria and Ernzerhof (HSE) functional was used for all calculations in this paper. The frequency dependent dielectric function has been calculated based on the HSE functional, and the absorption coefficient,  $\alpha(\omega)$  is defined by the following equation:

$$\alpha(\omega) = \sqrt{2} \omega (\sqrt{\varepsilon_1(\omega)^2 + \varepsilon_2(\omega)^2} - \varepsilon_1(\omega))^{1/2}$$

The optical simulations were conducted using the FDTD solutions. The full-wave calculation was based on the finite difference method to solve Maxwell equations in the time domain. The optical properties of samples required by FDTD simulations were acquired from the DFT calculations. The radiuses and thicknessed of different shells were set according to the Table S3 and Table S4. A simulation box with dimensions of 3×3×3  $\mu\text{m}$  was used. The resolution of the mesh grid was set to 2.5 nm across the simulation space. The light source ranged from 300 to 800 nm plane wave, normally incident to the materials. The refractive index of surrounding medium was set to be 1, which was the refractive index of air.



## Results and Discussion

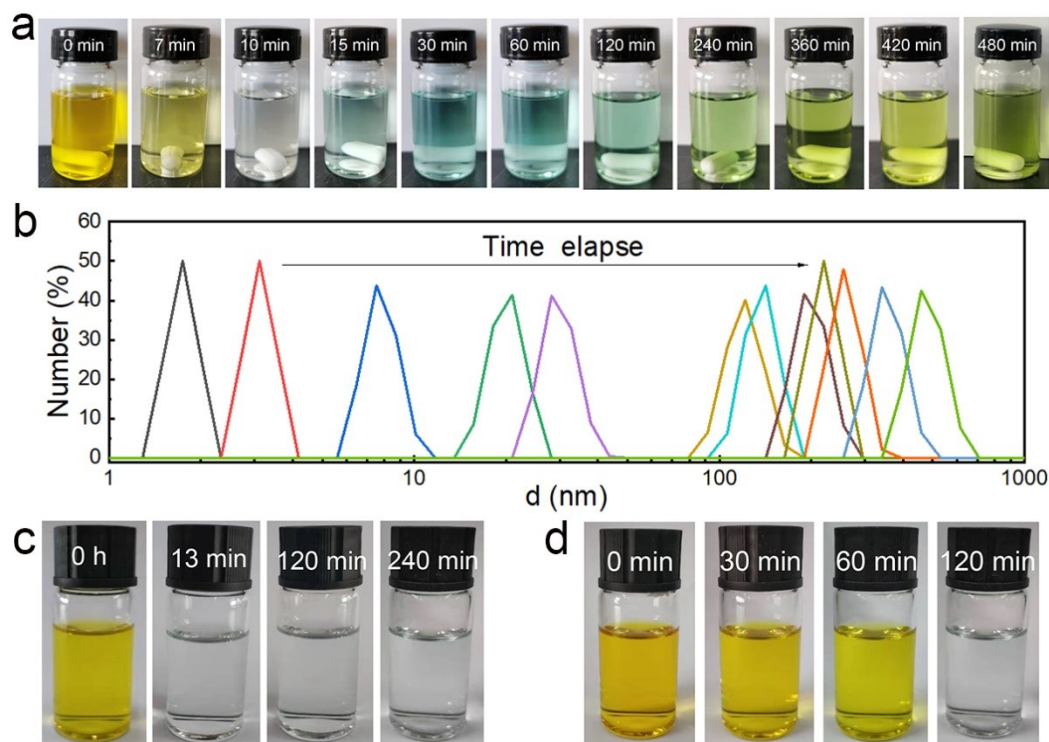

**Figure S1.** (a) Color changing of the  $WCl_6$  solution caused by alcoholysis reaction (the concentration of  $WCl_6$  is 0.01 M). (b) The change of the particle size distribution in  $WCl_6$  solution via dynamic light scattering measurement. (c) Color changing of the  $WCl_6$  solution (EtOH/Acetone=1) and (d) (EtOH/DMF=2). Experiments were performed under ambient condition.

As shown in **Figure S1a**, it could be clearly observed that the color changed from yellow (initial) to transparent (10 min), then to blue (15-120 min), and finally to yellow (>120 min), along with the apparently increased cluster size in the solution.

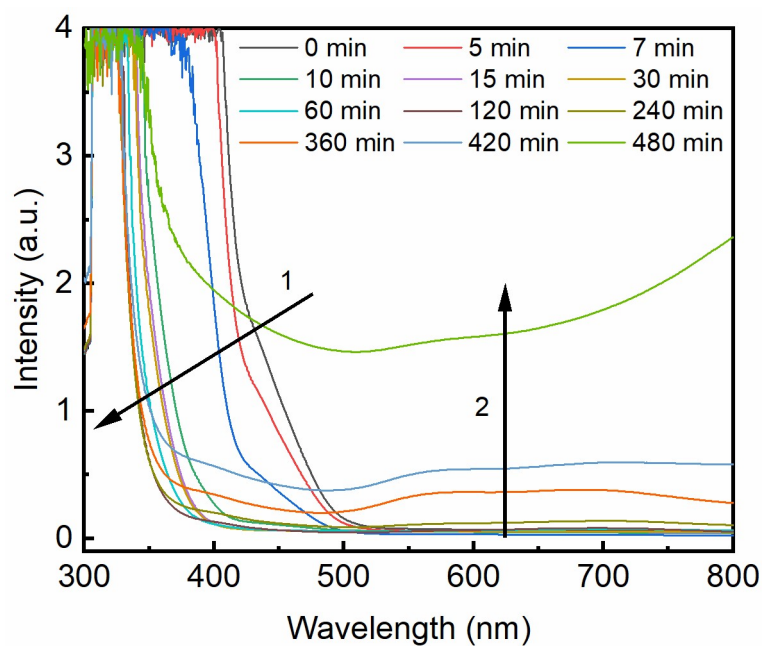

**Figure S2.** UV-vis absorption spectra changing of  $WCl_6$  solution as alcoholysis reaction progresses.

The quickly decreased yellow absorption band within 10 min indicated the formation of  $[W(OC_2H_5)_x]^{(6-x)+}$ , and the gradually increased absorption in near infrared section implied the condensation reaction of these alcoholysis resultants.

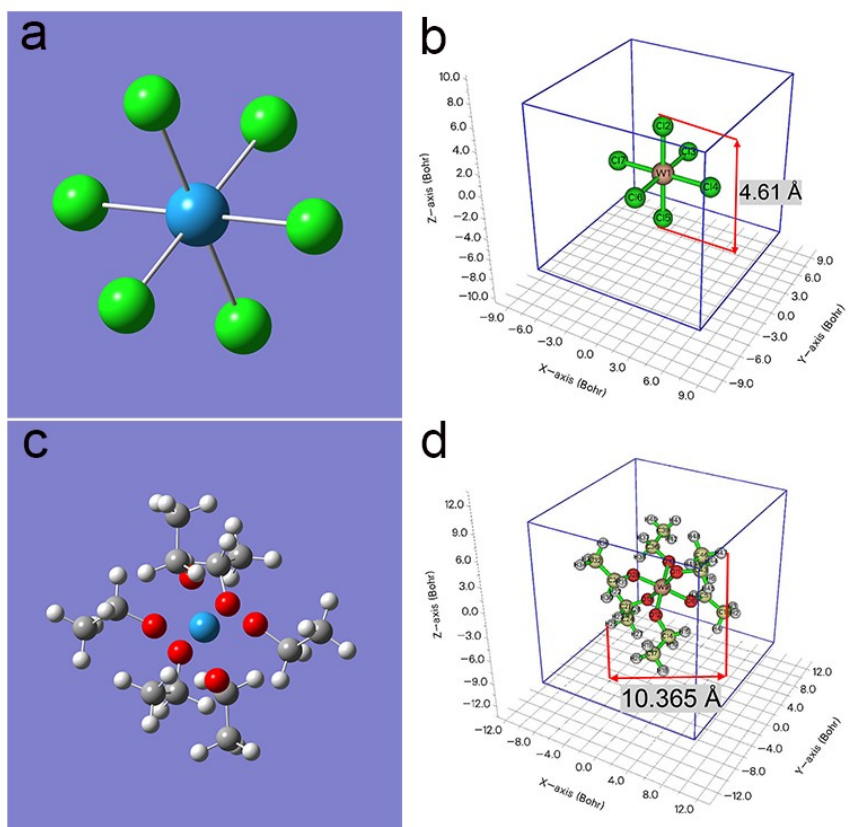

**Figure S3.** DFT calculated sizes of the tungsten precursors. (a) Model of the molecular structure of  $\text{WCl}_6$  where blue sphere is W atom and the green spheres represent Cl atoms; (b) the calculated size of  $\text{WCl}_6$  molecular; (c) model of the molecular structure of  $\text{W}(\text{OC}_2\text{H}_5)_6$ , the blue, red, grey and white spheres indicate W, O, C and H atoms, respectively; (d) the calculated size of  $\text{W}(\text{OC}_2\text{H}_5)_6$  molecular. According to (b) and (d), the size of  $\text{W}(\text{OC}_2\text{H}_5)_6$  molecular is obviously larger than that of  $\text{WCl}_6$  molecular.



a.  $\text{WCl}_6$  in pure EtOH:

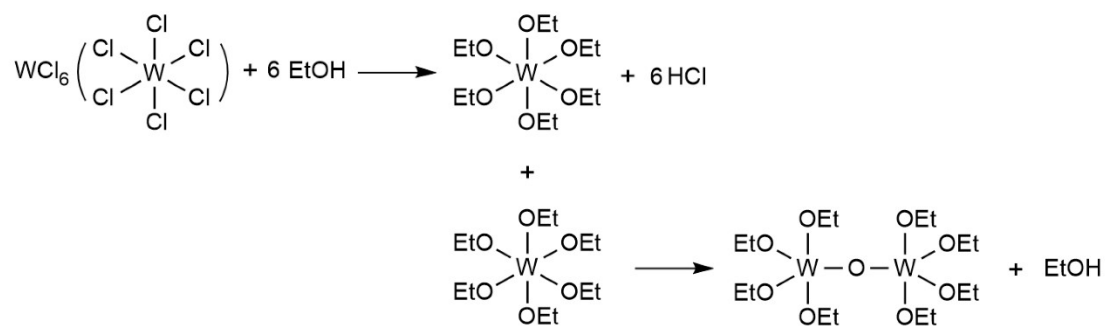

b.  $\text{WCl}_6$  in pure acetone:

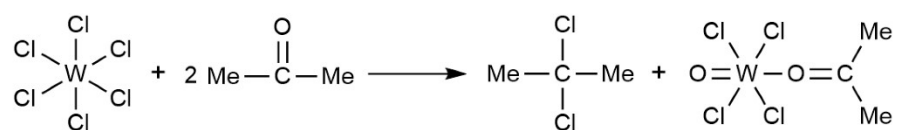

**Figure S4.** Reactions of  $\text{WCl}_6$  with pure (a) EtOH and (b) acetone.

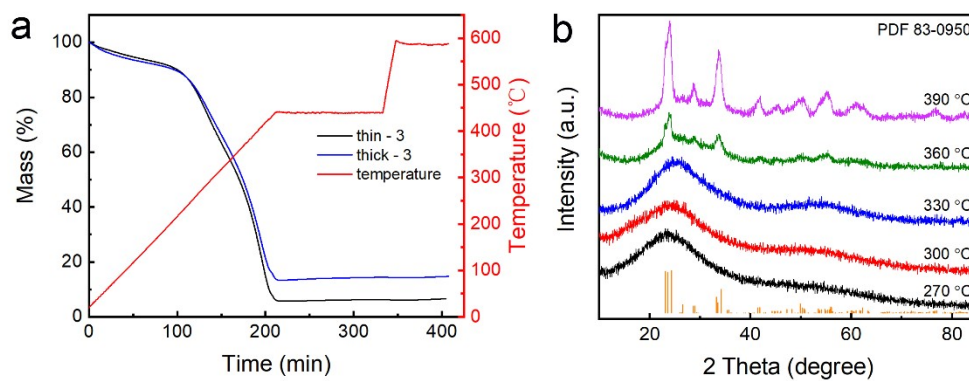

**Figure S5.** (a) Thermogravimetric (TG) curves of CMSs after absorption process. (b) XRD of CMSs after absorption calcinated at various temperatures.

The results in **Figure S2a** revealed that the amounts of metal ions adsorbed in the CMSs for thick-3  $\text{WO}_3$  HoMSs were larger than that in the CMSs for thin-3  $\text{WO}_3$  HoMSs. Experiments in **Figure S2b** were conducted under air atmosphere to mimic standard synthetic condition. The results indicated that the metal oxide was substantially formed at 270 °C.

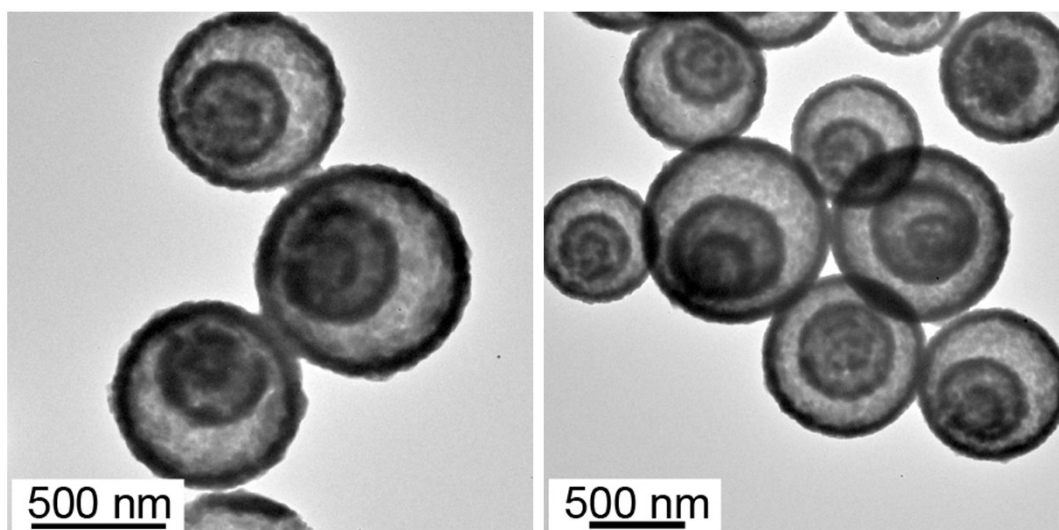

**Figure S6.** TEM images of triple shelled  $\text{WO}_3$  HoMSs prepared by DMF and EtOH as solvent. Experimental details are showing in Table S2.

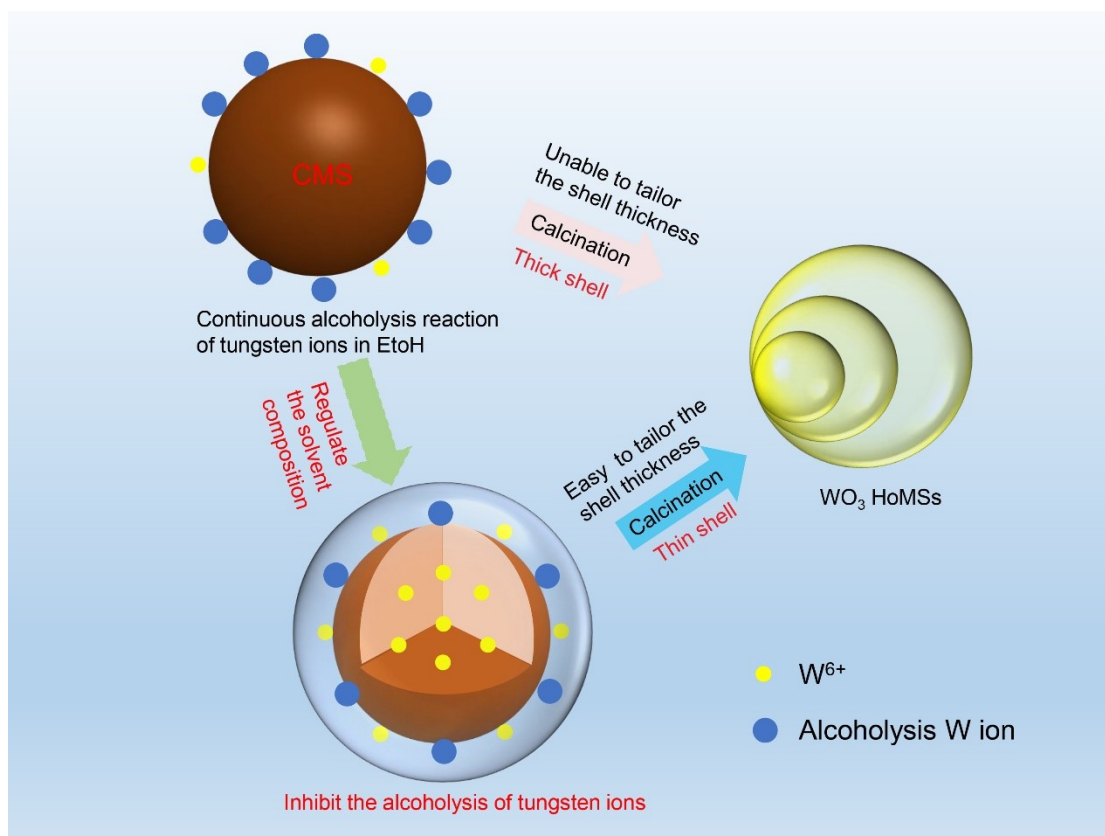

**Figure S7.** Schematic illustration of the solvent dominated adsorption process of CMSs templates for metal ions.

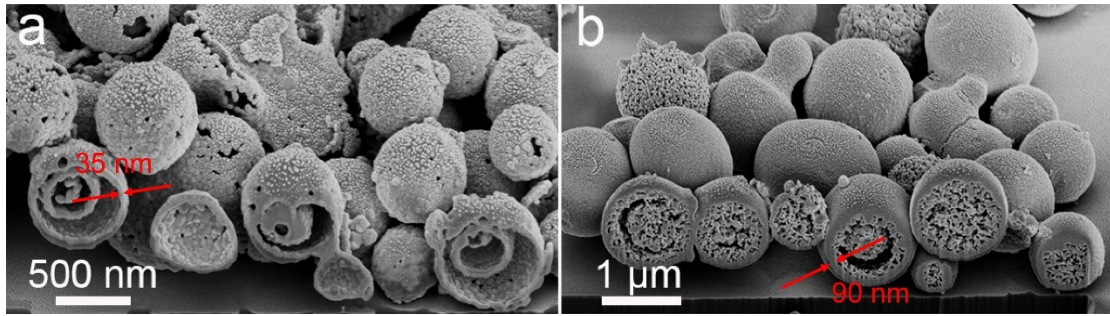

**Figure S8.** Large scale focused ion beam (FIB) - SEM images of the cross sections of (a) thin-3 and (b) thick-3  $\text{WO}_3$  HoMSs.

The adjacent shells in a  $\text{WO}_3$  HoMS are contact, which is beneficial to promoting the transfer of photogenerated charge carriers.

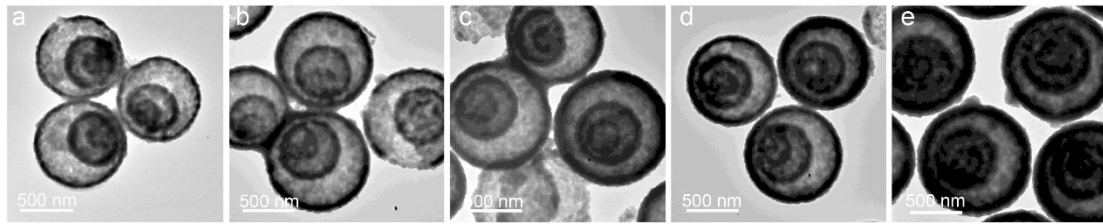

**Figure S9.** Regulation of the shell thickness by changing the solvent ratio and absorption duration. Average shell thicknesses of  $\text{WO}_3$  HoMSs in (a-e) are 35, 45, 55, 65 and 80 nm, respectively.

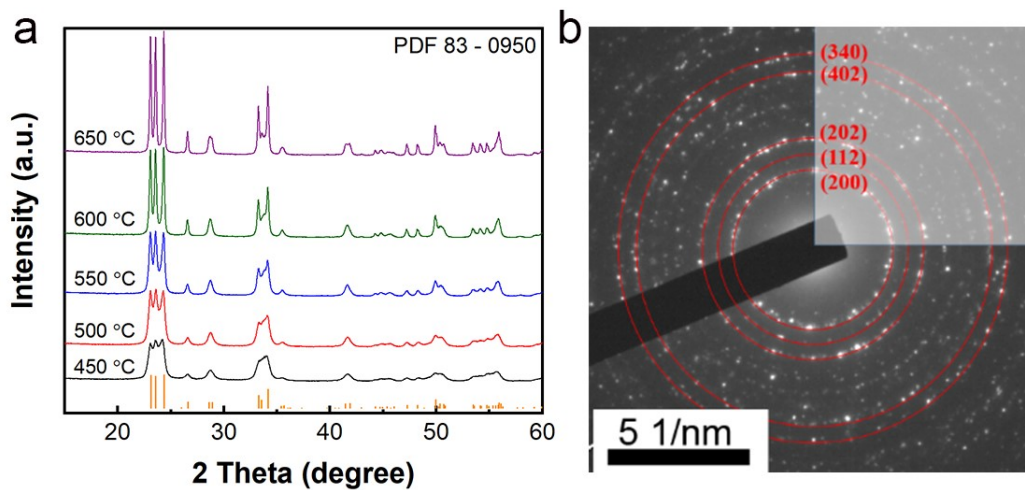

**Figure S10.** a) XRD patterns of  $\text{WO}_3$  HoMSs calcinated under different temperatures. The crystallinity of  $\text{WO}_3$  improved obviously as the calcination temperature increased. b) SAED image of thin triple-shelled  $\text{WO}_3$  HoMSs prepared at 600 °C.

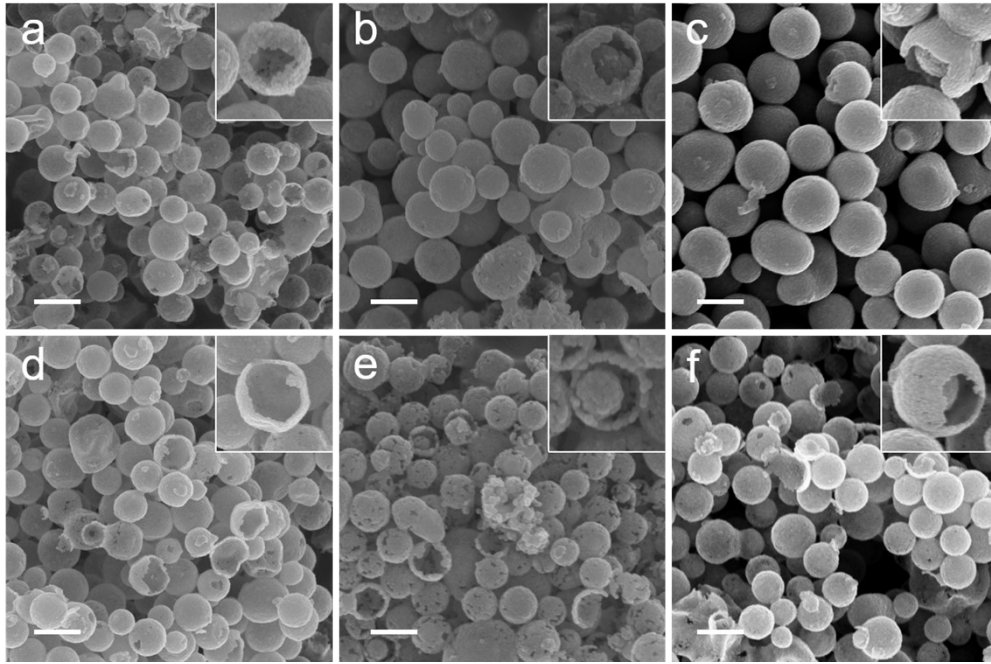

**Figure S11.** SEM images of as prepared samples. a) thick-1  $\text{WO}_3$  HoMSs, b) thick-2  $\text{WO}_3$  HoMSs, c) thick-3  $\text{WO}_3$  HoMSs, d) thin-1  $\text{WO}_3$  HoMSs, e) thin-2  $\text{WO}_3$  HoMSs, f) thin-3  $\text{WO}_3$  HoMSs, all insets show the high-magnification SEM images of typical microspheres. Scale bar, 1  $\mu\text{m}$ .



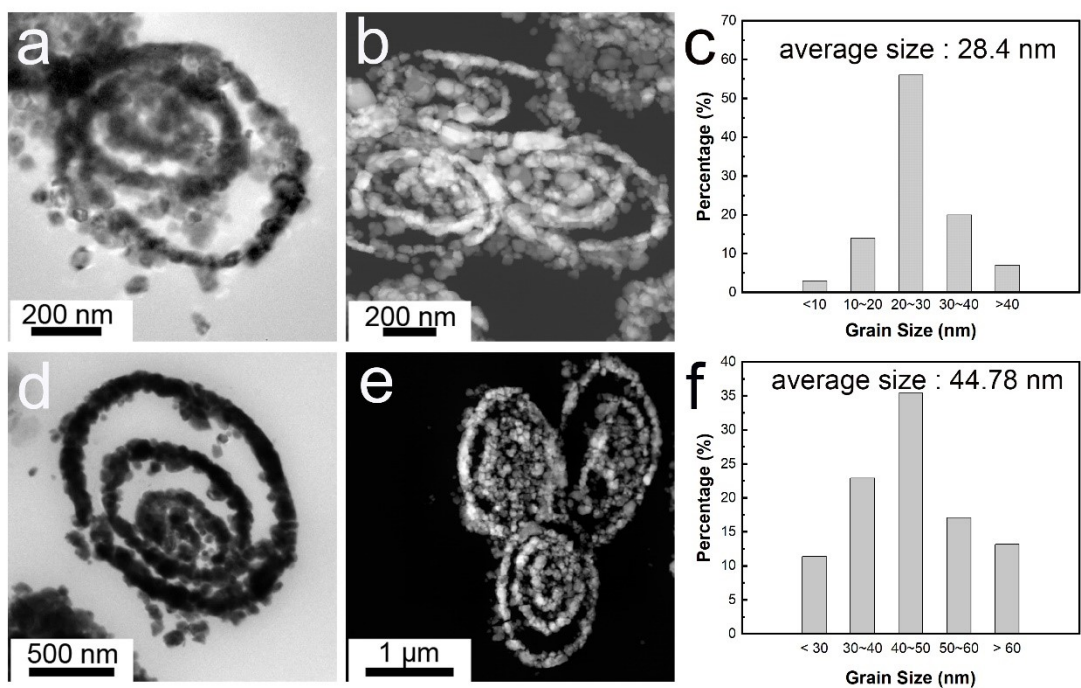

**Figure S12.** (a, b) TEM and STEM images of thin-3  $\text{WO}_3$  HoMSs slices, (c) is the size distribution of nanoparticles in thin-3  $\text{WO}_3$  HoMSs; (d, e) TEM and STEM images of thick-3  $\text{WO}_3$  HoMSs slices, (f) is the size distribution of nanoparticles in thick-3  $\text{WO}_3$  HoMSs.

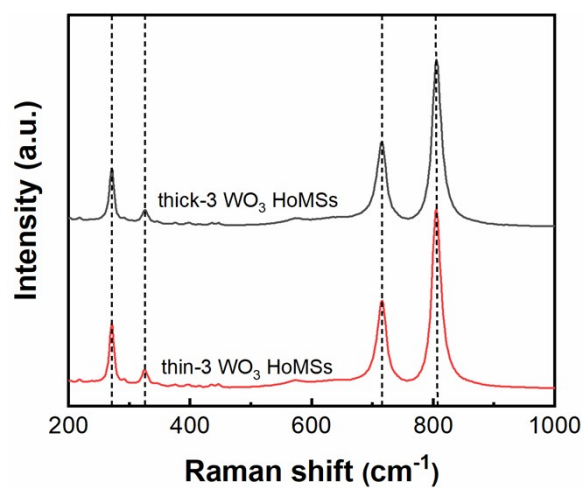

**Figure S13.** Raman spectra of thin-3 and thick-3 HoMSs.

The peaks at  $270\text{ cm}^{-1}$ ,  $324\text{ cm}^{-1}$ ,  $715\text{ cm}^{-1}$  and  $805\text{ cm}^{-1}$  are attributed to the bending and stretching mode of W-O-W of monoclinic structures. There is no apparent difference in the phase structure between different types of  $\text{WO}_3$  hollow structures, which is consistent with XRD results.

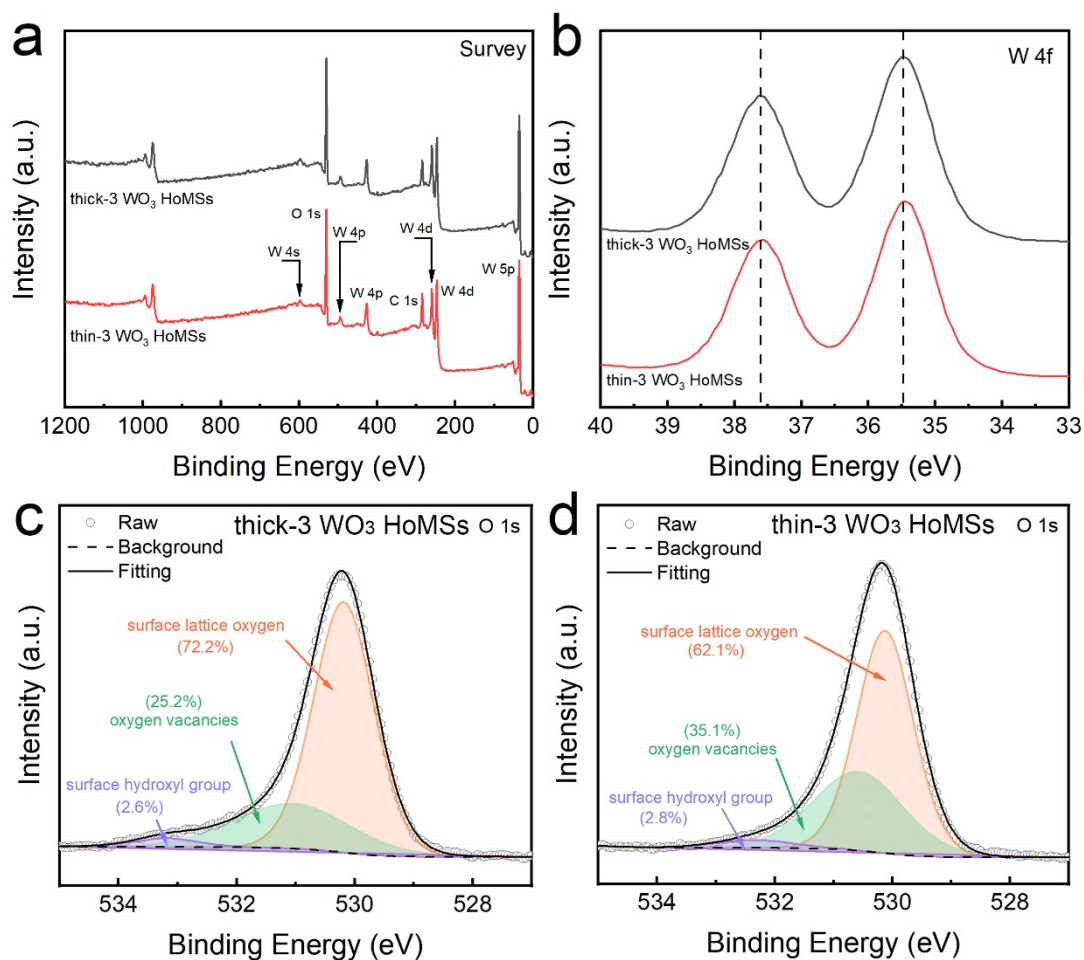

**Figure S14.** XPS spectra of thick- and thin-3 WO<sub>3</sub> HoMSs: (a) XPS survey spectra; (b) high-resolution XPS spectra of W 4f; (c) and (d) O1s orbitals of thick- and thin-3 WO<sub>3</sub> HoMSs.

These results suggest that the valence states and surface properties of thick- and thin-3 WO<sub>3</sub> HoMSs are similar. For O 1s XPS spectra of thick- and thin-3 WO<sub>3</sub> HoMSs, which can be deconvoluted into three peaks, including the peak of surface lattice oxygen species at 530.2 eV, the peak of oxygen vacancies at 531.06 eV and the peak of surface hydroxyl group at 533.2 eV. The ratio of oxygen vacancies in thin-3 WO<sub>3</sub> HoMSs (35.1%) is obvious larger than that in thick-3 WO<sub>3</sub> HoMSs (25.2%).

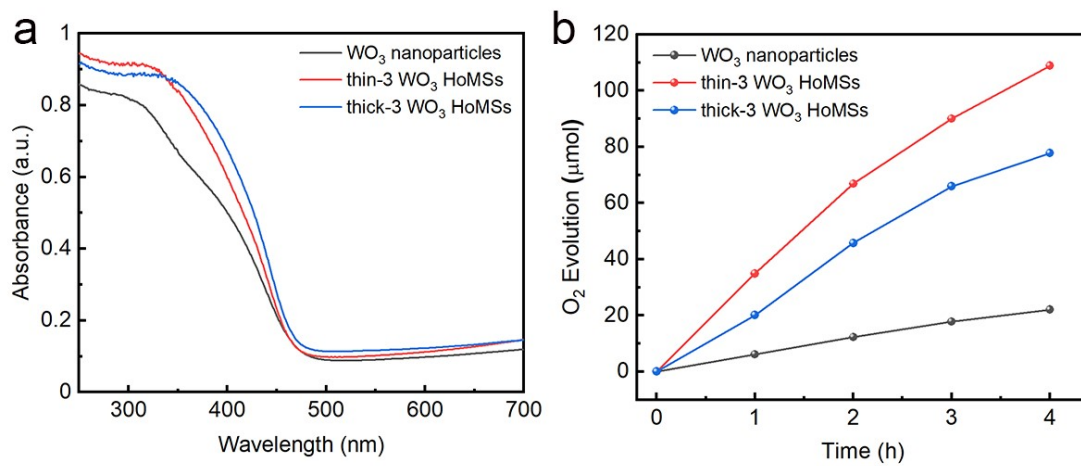

**Figure S15.** Comparison of (a) light-harvesting ability and (b) photocatalytic activities of WO<sub>3</sub> nanoparticles and WO<sub>3</sub> HoMSs.

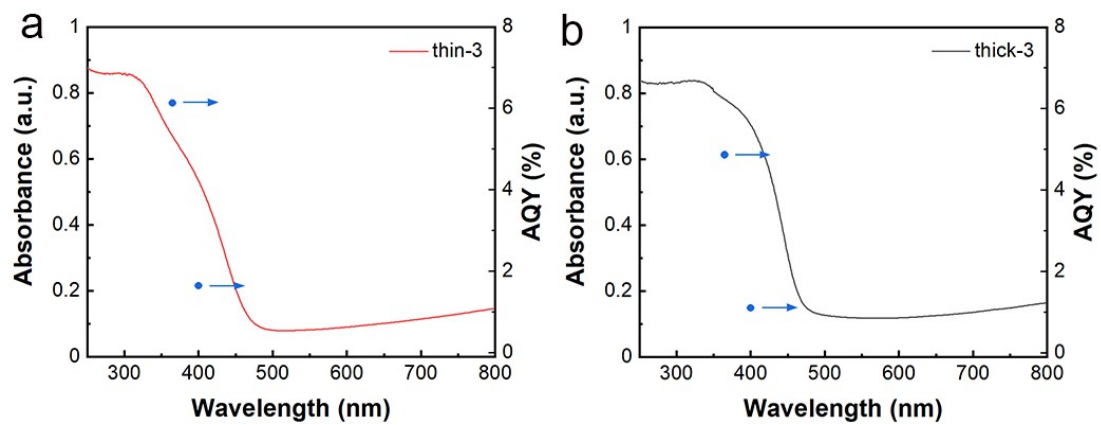

**Figure S16.** UV-vis absorption (left axis) spectrum and AQY plots (right axis) of (a) thin-3 and (b) thick-3  $\text{WO}_3$  HoMSs.

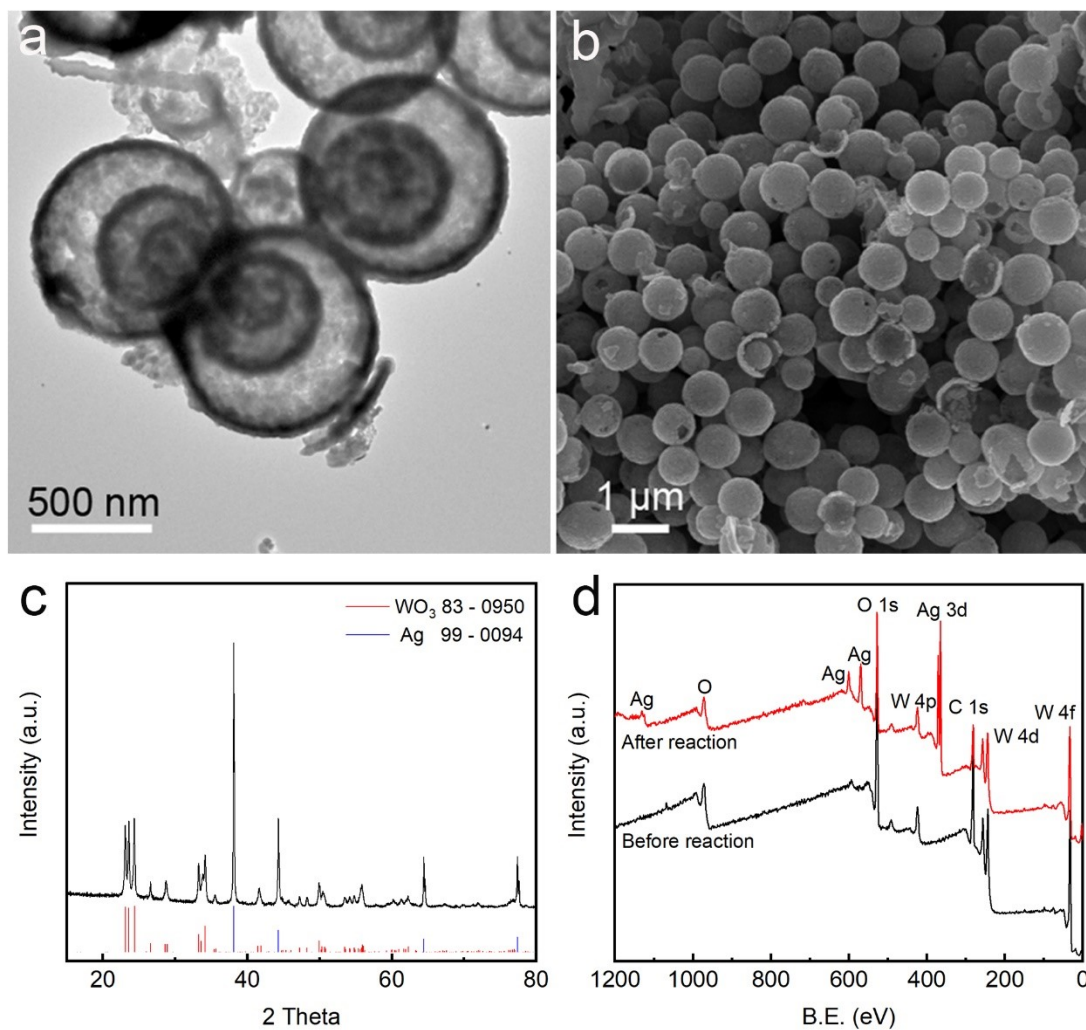

**Figure S17.** (a) TEM image, (b) SEM image, (c) XRD patterns and (d) XPS survey curves of thin-3  $\text{WO}_3$  HoMSs after photocatalytic test.

As shown in the picture above, the  $\text{WO}_3$  HoMSs keep its initial structures without collapse after long-time reaction. Besides, crystal structure and chemical states of  $\text{WO}_3$  HoMSs also remained stable.

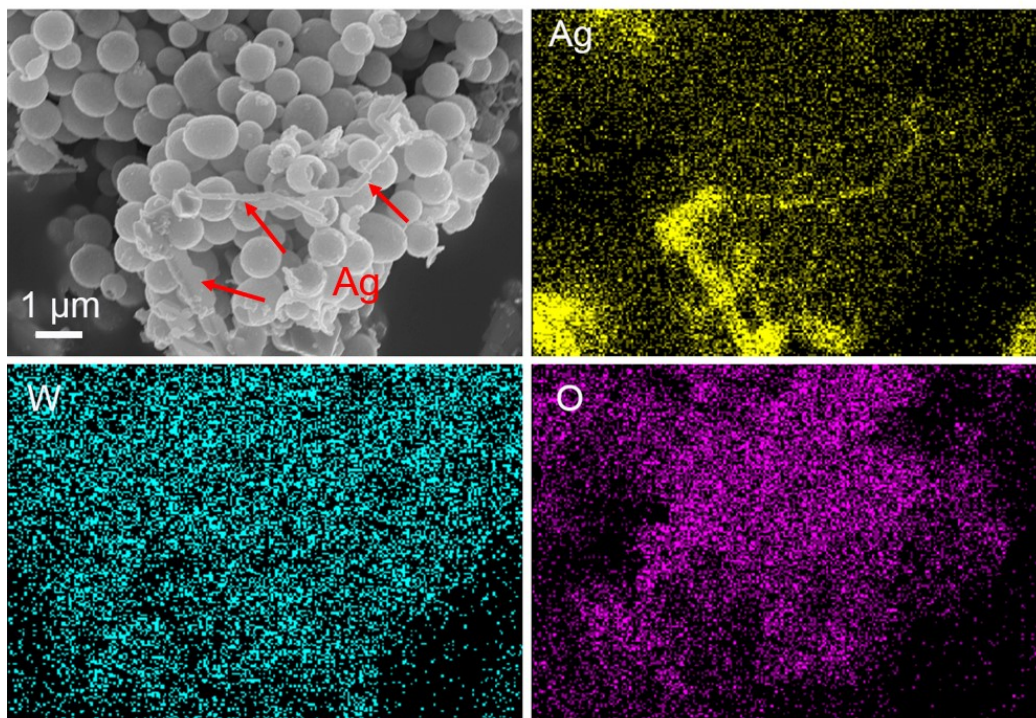

**Figure S18.** SEM images and elemental mapping of thin-3  $\text{WO}_3$  HoMSs after photocatalytic test.

The generated Ag is more inclined to self-assemble into nanowires or nanorods rather covering on the surface of  $\text{WO}_3$  HoMSs.

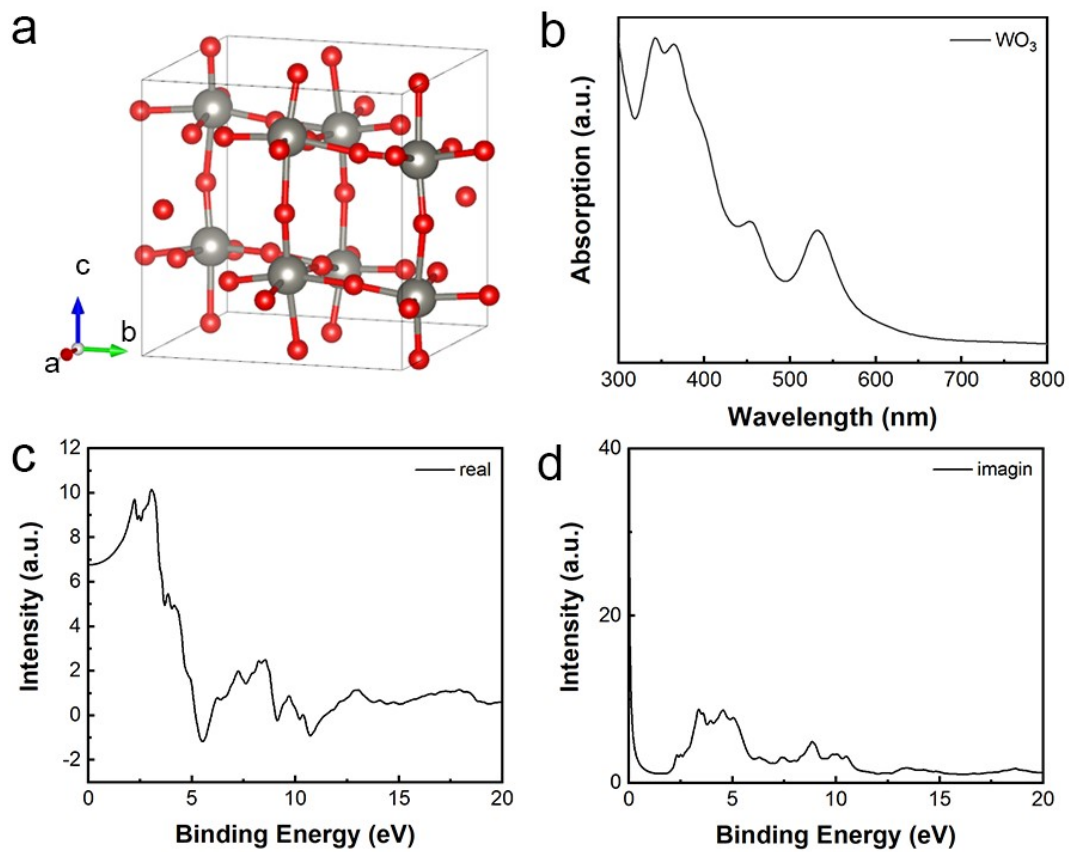

**Figure S19.** (a) Optimized crystal structure of  $\text{WO}_3$  HoMSs. (b) Light absorption spectrum, (c) Real and (d) imaginary dielectric constant of  $\text{WO}_3$  crystal obtained by first-principles calculations using the HSE06 functional.



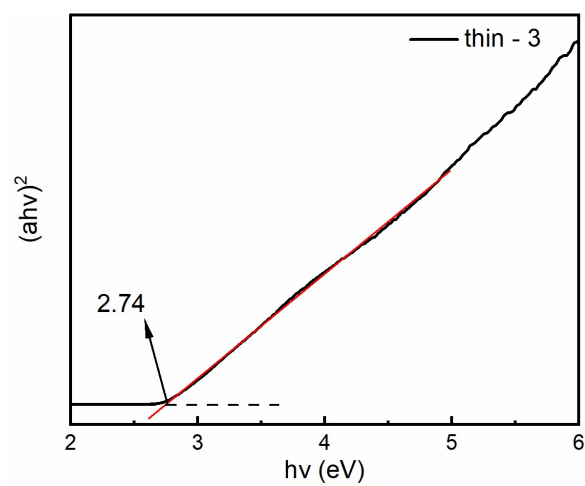

**Figure S20.** Tauc-plots of thin-3 WO<sub>3</sub> HoMSs.

The bandgap of thin-3 WO<sub>3</sub> HoMSs was calculated to be 2.74 eV, which is compliant with the value previous report.

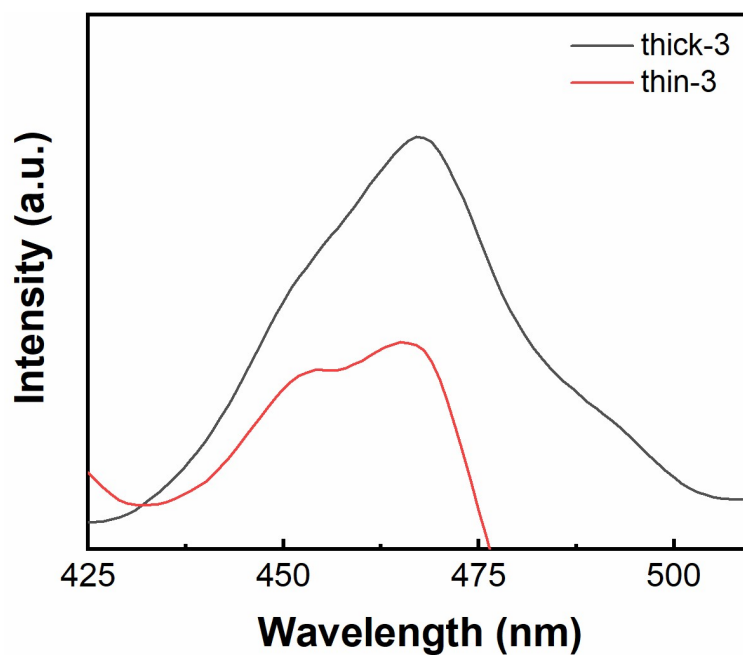

**Figure S21.** The steady-state PL emission spectra of thin-3  $\text{WO}_3$  HoMSs and thick-3  $\text{WO}_3$  HoMSs.

The photoluminescence (PL) spectra were recorded to investigate the separation efficiency of photogenerated carriers in triple-shelled  $\text{WO}_3$  HoMSs with different shell thickness. The emission peak intensity of thick-3  $\text{WO}_3$  HoMSs is much stronger than that of thin-3  $\text{WO}_3$  HoMSs, which reveals the shell thickness has significant influence on the separation of photogenerated electron-hole pairs. The weak emission peak intensity of thin-3  $\text{WO}_3$  HoMSs indicates their lower charge-carrier recombination.

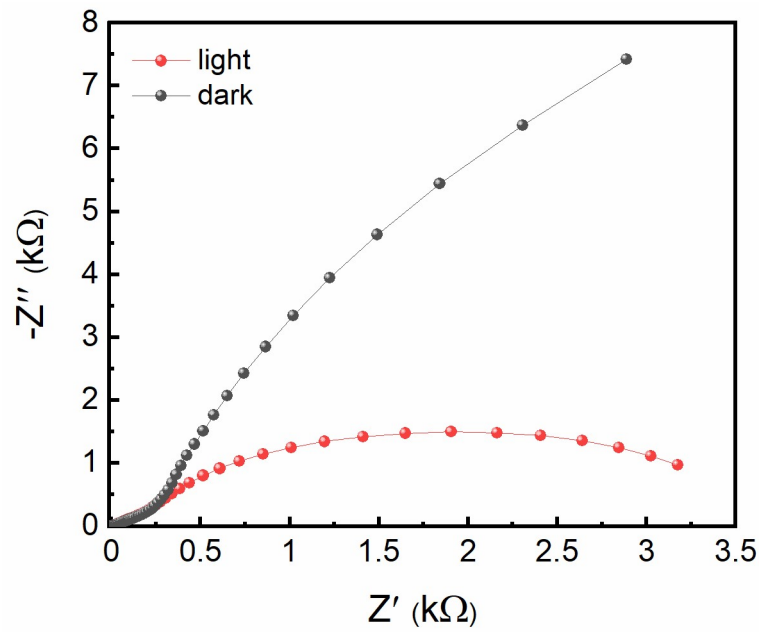

**Figure S22.** EIS Nyquist plots of thin-3 electrode measured in dark and visible-light irradiation in 0.5 M potassium phosphate buffer (pH = 7) solution.

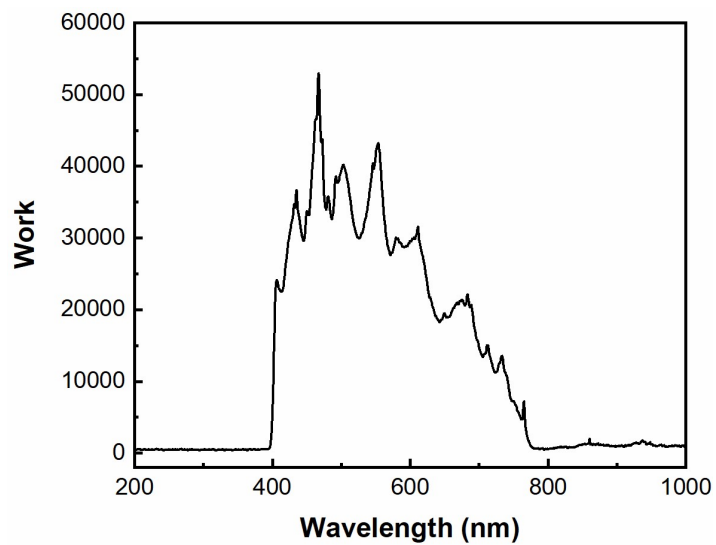

**Figure S23.** The power spectra of the 300 W Xe lamp equipped with a filter of visible light ( $\lambda > 400$  nm).

**Table S1.** Summary of synthesis conditions for the WO<sub>3</sub> HoMSs

| Structure types                       | thin-1 | thin-2 | thin-3 | thick-1 | thick-2 | thick-3 |
|---------------------------------------|--------|--------|--------|---------|---------|---------|
| Average shell thickness (nm)          | 20     | 20     | 35     | 50      | 60      | 90      |
| Concentration of WCl <sub>6</sub> (M) | 0.02   | 0.02   | 0.02   | 0.05    | 0.05    | 0.05    |
| Solvent ratio (acetone/EtOH)          | 1:2    | 2:1    | 1:1    | 0:1     | 0:1     | 0:1     |
| Adsorption temperature (°C)           | 25     | 25     | 25     | 25      | 40      | 50      |
| Adsorption duration (h)               | 0.5    | 1      | 3      | 6       | 12      | 12      |
| Calcination temperature (°C)          | 600    | 600    | 600    | 600     | 600     | 600     |

**Table S2.** Synthesis condition of WO<sub>3</sub> HoMSs when DMF was introduced.

| Structure types          | Concentration of WCl <sub>6</sub> (M) | Solvent                  | Adsorption temperature (°C) | Adsorption duration | Calcination temperature (°C) |
|--------------------------|---------------------------------------|--------------------------|-----------------------------|---------------------|------------------------------|
| WO <sub>3</sub><br>HoMSs | 0.02                                  | 20 ml EtOH,<br>10 ml DMF | 30                          | 50 min              | 600                          |

**Table S3.** Comparison of the shell thicknesses of thick-3 and thin-3 WO<sub>3</sub> HoMSs (Shell-1 indicates the outmost shell and shell-3 indicates the innermost shell).

| Thickness<br>(nm) | Shell-1 | Shell-2 | Shell-3 |
|-------------------|---------|---------|---------|
| thick-3           | 90      | 55      | 45      |
| thin-3            | 35      | 35      | 40      |

**Table S4.** N<sub>2</sub> sorption analysis results of thick-3 and thin-3 WO<sub>3</sub> HoMSs.

| Sample  | Specific surface area<br>(m <sup>2</sup> g <sup>-1</sup> ) | Average pore<br>diameter (nm) | Total pore volume<br>(cc g <sup>-1</sup> ) |
|---------|------------------------------------------------------------|-------------------------------|--------------------------------------------|
| Thick-3 | 40.957                                                     | 9.819                         | 0.153                                      |
| Thin-3  | 62.438                                                     | 13.292                        | 0.136                                      |



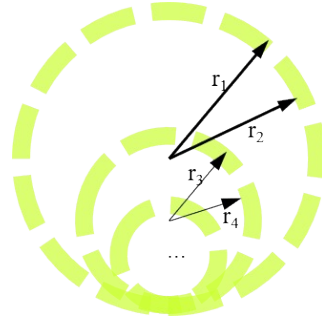

**Scheme S1.** A simple model of WO<sub>3</sub> HoMSs.

**Table S5.** Summary of structural parameters of thick-3 and thin-3 WO<sub>3</sub> HoMSs.

| radius (nm) | r <sub>1</sub> | r <sub>2</sub> | r <sub>3</sub> | r <sub>4</sub> | r <sub>5</sub> | r <sub>6</sub> |
|-------------|----------------|----------------|----------------|----------------|----------------|----------------|
| thick-3     | 600            | 510            | 350            | 295            | 190            | 145            |
| thin-3      | 385            | 350            | 215            | 180            | 100            | 60             |

$$V_1 = \frac{4}{3} \pi (r_1^3 - r_2^3); V_2 = \frac{4}{3} \pi (r_3^3 - r_4^3); V_3 = \frac{4}{3} \pi (r_5^3 - r_6^3);$$

$$V = V_1 + V_2 + V_3$$

For thick-3 WO<sub>3</sub> HoMSs,

$$V_{\text{thick-3}} \rho N_1 = m,$$

where  $\rho$  is the density of WO<sub>3</sub>,  $N_1$  is the number of thick-3 WO<sub>3</sub> HoMSs,  $m$  is the weight of thick-3 WO<sub>3</sub> HoMSs.

For thin-3 WO<sub>3</sub> HoMSs,

$$V_{\text{thin-3}} \rho N_2 = m,$$

where  $\rho$  is the density of WO<sub>3</sub>,  $N_2$  is the number of thin-3 WO<sub>3</sub> HoMSs,  $m$  is the weight of thin-3 WO<sub>3</sub> HoMSs.

For the same weight of WO<sub>3</sub> HoMSs,

$$V_{\text{thick-3}} \rho N_1 = V_{\text{thin-3}} \rho N_2, \text{ therefore, } \frac{N_2}{N_1} = \frac{V_{\text{thick-3}}}{V_{\text{thin-3}}} = 5.47$$

Namely, for the same weight of WO<sub>3</sub> HoMSs, the number of thin-3 WO<sub>3</sub> HoMSs is 5.47 times as high as that of thick-3 WO<sub>3</sub> HoMSs.

**Table S6.** Comparison of photocatalytic O<sub>2</sub> evolution performance of tungsten oxide-based photocatalysts in other works.

| Catalyst                                                                     | Sacrificial agent               | Light source                           | Maximum OER rate<br>( $\mu\text{molg}^{-1}\text{h}^{-1}$ ) | AQY               | Ref       |
|------------------------------------------------------------------------------|---------------------------------|----------------------------------------|------------------------------------------------------------|-------------------|-----------|
| Thin-3 WO <sub>3</sub>                                                       | AgNO <sub>3</sub>               | 300 W Xe lamp                          | 907                                                        | 6.13%             | This work |
| HoMSs                                                                        | (0.01 M)                        | ( $\lambda > 400$ nm)                  |                                                            | (365 nm)          |           |
| Thick-3 WO <sub>3</sub>                                                      | AgNO <sub>3</sub>               | 300 W Xe lamp                          | 648.1                                                      | 4.86%             | This work |
| HoMSs                                                                        | (0.01 M)                        | ( $\lambda > 400$ nm)                  |                                                            | (365 nm)          |           |
| WO <sub>3</sub> /B <sub>2</sub> O <sub>3-x</sub> N <sub>x</sub> nanoclusters | AgNO <sub>3</sub><br>(0.0185 M) | 300 W Xe lamp<br>( $\lambda > 400$ nm) | 745                                                        | N/A               | 1         |
| WO <sub>3</sub> /RGO@Pt                                                      | KIO <sub>3</sub><br>(0.005 M)   | 150 W Xe lamp<br>( $\lambda > 420$ nm) | 87.46                                                      | 3.4%<br>(420 nm)  | 2         |
| WO <sub>3</sub> /H <sub>x</sub> WO <sub>3</sub>                              | AgNO <sub>3</sub><br>(0.01 M)   | 300 W Xe lamp<br>( $\lambda > 420$ nm) | 376.5                                                      | N/A               | 3         |
| WO <sub>3</sub> /Oxygen vacancy                                              | NaIO <sub>3</sub><br>(0.01 M)   | Xe lamp<br>(AM 1.5)                    | 1594                                                       | 14.8%<br>(350 nm) | 4         |
| Ru-WO <sub>3</sub>                                                           | NaIO <sub>3</sub> (0.005 M)     | 300 W Xe lamp<br>( $\lambda > 300$ nm) | 65 $\mu\text{mol h}^{-1}$                                  | N/A               | 5         |
| WO <sub>3</sub> /Oxygen vacancy                                              | AgNO <sub>3</sub><br>(0.0118 M) | 300 W Xe lamp<br>( $\lambda > 420$ nm) | 278.6                                                      | N/A               | 6         |
| Pt@Cu <sub>2</sub> O/ WO <sub>3</sub>                                        | AgNO <sub>3</sub><br>(0.01 M)   | 300 W Xe lamp                          | 1238.6                                                     | 1.2%<br>(420 nm)  | 7         |
| WO <sub>3</sub> /Oxygen vacancy                                              | AgNO <sub>3</sub><br>(0.029 M)  | 300 W Xe lamp<br>( $\lambda > 400$ nm) | 501.25                                                     | N/A               | 8         |
| WO <sub>3</sub> /Oxygen vacancy                                              | AgNO <sub>3</sub><br>(0.01 M)   | 500 W Xe lamp<br>(AM 1.5)              | 320                                                        | 0.14%<br>(420 nm) | 9         |
| WO <sub>3</sub> /rGO                                                         | AgNO <sub>3</sub><br>(0.03 M)   | 300 W Xe lamp                          | 580                                                        | N/A               | 10        |

|                                       |                                                          |                                        |      |                  |    |
|---------------------------------------|----------------------------------------------------------|----------------------------------------|------|------------------|----|
| WO <sub>3</sub> /TiO <sub>2</sub>     | -                                                        | 300 W Xe lamp<br>( $\lambda > 420$ nm) | 178  | 1.8%<br>(420 nm) | 11 |
| Cs-WO <sub>3</sub>                    | FeCl <sub>3</sub><br>(0.004 M)                           | 100 W LED<br>lamp                      | 51.3 | 3.7%<br>(420 nm) | 12 |
| Pt/WO <sub>3</sub> /Oxygen<br>vacancy | Na <sub>2</sub> S <sub>2</sub> O <sub>8</sub><br>(0.1 M) | 300 W Xe lamp                          | 1037 | N/A              | 13 |

## References

1. Y. P. Xie, G. Liu, G. Q. Lu and H. M. Cheng, Boron oxynitride nanoclusters on tungsten trioxide as a metal-free cocatalyst for photocatalytic oxygen evolution from water splitting, *Nanoscale*, 2012, **4**, 1267-1270.
2. H. Huang, Z. Yue, G. Li, X. Wang, J. Huang, Y. Du and P. Yang, Ultraviolet-assisted preparation of mesoporous WO<sub>3</sub>/reduced graphene oxide composites: superior interfacial contacts and enhanced photocatalysis, *J. Mater. Chem. A*, 2013, **1**.
3. G. Liu, J. Han, X. Zhou, L. Huang, F. Zhang, X. Wang, C. Ding, X. Zheng, H. Han and C. Li, Enhancement of visible-light-driven O<sub>2</sub> evolution from water oxidation on WO<sub>3</sub> treated with hydrogen, *J. Catal.*, 2013, **307**, 148-152.
4. J. Yan, T. Wang, G. Wu, W. Dai, N. Guan, L. Li and J. Gong, Tungsten oxide single crystal nanosheets for enhanced multichannel solar light harvesting, *Adv Mater*, 2015, **27**, 1580-1586.
5. H. Suzuki, S. Nitta, O. Tomita, M. Higashi and R. Abe, Highly Dispersed RuO<sub>2</sub> Hydrates Prepared via Simple Adsorption as Efficient Cocatalysts for Visible-Light-Driven Z-Scheme Water Splitting with an IO<sup>3-</sup>/I<sup>-</sup> Redox Mediator, *ACS Catal.*, 2017, **7**, 4336-4343.
6. Q. Liu, F. Wang, H. Lin, Y. Xie, N. Tong, J. Lin, X. Zhang, Z. Zhang and X. Wang, Surface oxygen vacancy and defect engineering of WO<sub>3</sub> for improved visible light photocatalytic performance, *Catal. Sci. Technol.*, 2018, **8**, 4399-4406.
7. H. Gong, Y. Zhang, Y. Cao, M. Luo, Z. Feng, W. Yang, K. Liu, H. Cao and H.

- Yan, Pt@Cu<sub>2</sub>O/WO<sub>3</sub> composite photocatalyst for enhanced photocatalytic water oxidation performance, *Appl. Catal. B: Environ.*, 2018, **237**, 309-317.
8. J. Meng, Q. Lin, T. Chen, X. Wei, J. Li and Z. Zhang, Oxygen vacancy regulation on tungsten oxides with specific exposed facets for enhanced visible-light-driven photocatalytic oxidation, *Nanoscale*, 2018, **10**, 2908-2915.
  9. Y. H. Chew, J. Y. Tang, L. J. Tan, B. W. J. Choi, L. L. Tan and S. P. Chai, Engineering surface oxygen defects on tungsten oxide to boost photocatalytic oxygen evolution from water splitting, *Chem. Commun.*, 2019, **55**, 6265-6268.
  10. J. Ke, H. Zhou, J. Liu, Z. Zhang, X. Duan and S. Wang, Enhanced light-driven water splitting by fast electron transfer in 2D/2D reduced graphene oxide/tungsten trioxide heterojunction with preferential facets, *J Colloid Interface Sci*, 2019, **555**, 413-422.
  11. X. An, Z. Shang, Y. Bai, H. Liu and J. Qu, Synergetic Photocatalytic Pure Water Splitting and Self-Supplied Oxygen Activation by 2D WO<sub>3</sub>/TiO<sub>2</sub> Heterostructures, *ACS Sustainable Chem. Eng.*, 2019, **7**, 19902-19909.
  12. D. Li, R. Chen, S. Wang, X. Zhang, Y. Zhang, J. Liu, H. Yin, F. Fan, J. Shi and C. Li, Unraveling the Kinetics of Photocatalytic Water Oxidation on WO<sub>3</sub>, *J. Phys. Chem. Lett.*, 2020, **11**, 412-418.
  13. Z. Wei, W. Wang, W. Li, X. Bai, J. Zhao, E. C. M. Tse, D. L. Phillips and Y. Zhu, Steering Electron–Hole Migration Pathways Using Oxygen Vacancies in Tungsten Oxides to Enhance Their Photocatalytic Oxygen Evolution Performance, *Angew. Chem. Int. Ed.*, 2021, **60**, 8236-8242.
